# Supplementary material
Source: PubMed Central journal article supplement (PMC1747015)
Supplement: thorax_59_5_421__2.pdf [file thorax_59_5_421__2.pdf]

**Table S2** Distribution of CURB criteria according to the pneumonia severity index (PSI) severity scoring system

| CURB criteria | Risk class  |             |             |              |             | Total |
|---------------|-------------|-------------|-------------|--------------|-------------|-------|
|               | I           | II          | III         | IV           | V           |       |
| 0             | 30<br>(88%) | 27<br>(55%) | 64<br>(66%) | 53<br>(28%)  | 7<br>(6%)   | 181   |
| 1             | 4<br>(12%)  | 20<br>(41%) | 31<br>(32%) | 100<br>(53%) | 32<br>(29%) | 187   |
| 2             |             | 2<br>(4%)   | 2<br>(2%)   | 30<br>(16%)  | 48<br>(42%) | 82    |
| 3             |             |             |             | 6<br>(3%)    | 21<br>(19%) | 27    |
| 4             |             |             |             | 1<br>(0.5%)  | 4<br>(4%)   | 5     |
| Total         | 34          | 49          | 97          | 190          | 112         | 482   |
|               |             |             |             |              |             |       |
